# Supplementary material for: A self-assembled RNA-triple helix hydrogel drug delivery system targeting triple-negative breast cancer
Source: Royal Society of Chemistry journal article supplement (doi:10.1039/c9tb01610d), 2019-11-08
Supplement: c9tb01610d1.pdf [file c9tb01610d1.pdf]

## **Supporting information for**

# **Self-assembled RNA-triple-helix hydrogel drug delivery system targeting for triple-negative breast cancer**

Lairong Ding,<sup>a,b</sup> Junwei Li,<sup>a,b</sup> Changrong Wu,<sup>b</sup> Feng Yan,<sup>b</sup> Xuemei Li,<sup>\*b</sup> and Shusheng Zhang<sup>b</sup>

<sup>†</sup>Center of Cooperative Innovation for Chemical Imaging Functional Probes in Universities of Shandong, College of Chemistry, Shandong Normal University, Jinan 250014, P.R. China.

<sup>‡</sup>Shandong Provincial Key Laboratory of Detection Technology for Tumor Markers, School of Chemistry and Chemical Engineering, Research Institute of Biochemical Analysis, Linyi University, Linyi 276005, P. R. China.

### **The supporting information has following contents:**

1. Table 1 DNA/RNA sequences used in the experiment
2. Table 2 Relative tumor proliferation rate of RNA-triple-helix hydrogel
3. Figure S1 According to the fluorescence intensity to determinate the cleaning speed
4. Figure S2 Stability studies of RNA-triple-helix hydrogel in different solutions
5. Figure S3 Flow cytometry to test the targeted of RNA-triple-helix hydrogel.
6. Figure S4 In vivo tumor therapy via RNA-triple-helix hydrogel.

Table 1 DNA/RNA sequences used in the experiment

|                   |                                                                                                                                                                                                                                                  |
|-------------------|--------------------------------------------------------------------------------------------------------------------------------------------------------------------------------------------------------------------------------------------------|
| ss DNA            | 5'-PO <sub>4</sub> - <b>ATAGT</b> <b>GAGTCGTATTA</b> TAA AAT CTT CCT GCC CAC CTT<br>ATCTAAATGTGGTGGTTGTGATCCTAAAA <b>AAG GTG GGC AGG AAG</b><br><b>ATT TTA</b> TTC CTA TTC TTA <b>CCT GAA CTT CAC TCC ACT GAA ATC</b><br><b>TGG T ATCCCT</b> -3' |
| miR-205 antisense | 5'-FAM-CUUGUCCUUCAUUCCACCGGAGUCUGUC-3'                                                                                                                                                                                                           |
| miR-221 antagomiR | 5'-FAM-CCUGAAAUCUACAUUGUAUGCCAGGUUGGU-3'                                                                                                                                                                                                         |
| Scrambled RNA-205 | 5'-CGC AUA UUC UAA GUU AUC UCG GAG GAT A-3'                                                                                                                                                                                                      |
| Scrambled RNA-221 | 5'-CGU AUU UCG CGU GAU AAC AUA CGA CUC UAA-3'                                                                                                                                                                                                    |
| T7 promoter       | 5'-TAATACGACTCACTATAGGAT-3'                                                                                                                                                                                                                      |
| LXL apt-DNA-Chol  | 5'-FAM-<br><b>GAATT</b> <b>CAGTCGGACAGCGAAGTAGTTTTCTTCTAACCTAAGAACC</b><br><b>CGCGGCAGTTTAATGTAGATGGACGAAAATCCTAGTGTTGGTGGTGT</b><br><b>AAATC</b> -Chol—3'                                                                                       |

All the sequence had no advanced purified after we got them.

Table 2 Relative tumor proliferation rate of RNA-triple-helix hydrogel

| D0 | D3 | D6 | D8 | D9 | D10 | D12 | D13 | D14 | D15 | D16 | D17 |
|----|----|----|----|----|-----|-----|-----|-----|-----|-----|-----|
| 87 | 25 | 22 | 19 | 19 | 20  | 16  | 13  | 13  | 9   | 11  | 8   |

When the relative tumor proliferation rate is greater than 60%, it shows useless, while not vice versa. From the Table 2, we can see the effect of RNA triple helix. The volume of tumors were calculated by the following formula:  $T/C = TRTV/CRTV \times 100\%$ ,  $TRTV = V_t/V_0$ ,  $V_t$ :the real size of tumor size.  $V_0$ :the first day of tumor size. CRTV represents the Control triple helix.

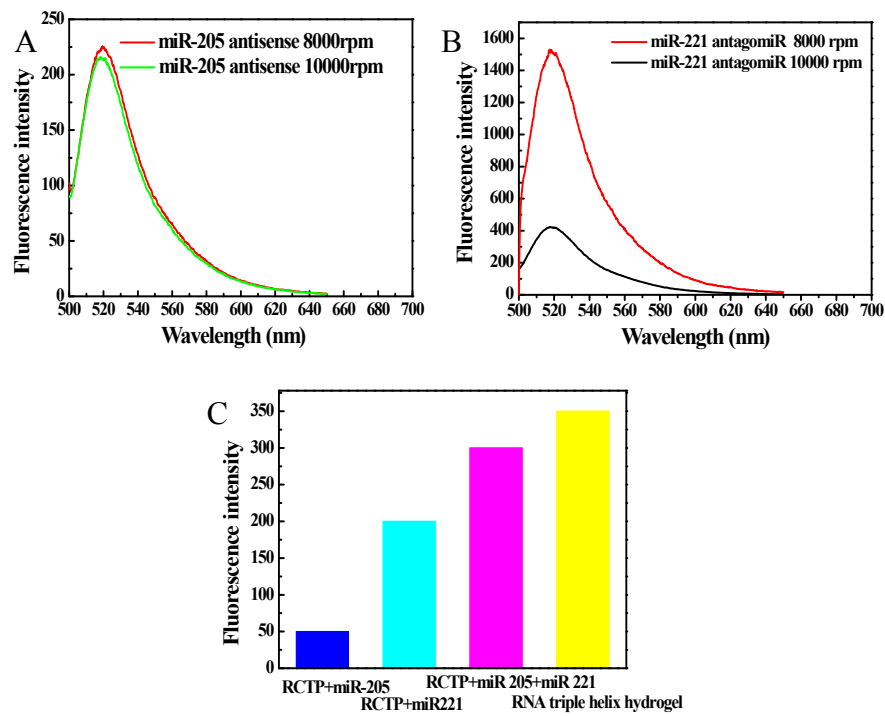

Figure S1 (A, B) Determine the cleaning speed of miR-205 antisense and miR-221 antagomiR. (C) Quantitative analysis of the product at every stages.

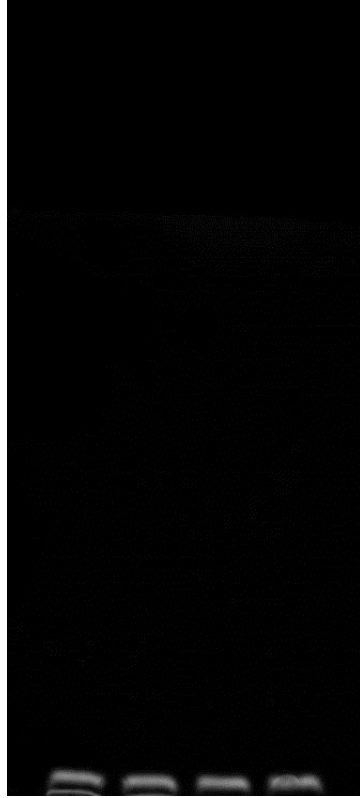

Figure S2. Stability studies of RNA-triple-helix hydrogel in different solutions for 6 h. Lane 1, pH 7.4 PBS; lane 2, pH 5.5 buffer solution; lane 3, pH 7.4 FBS; lane 4, pH 5.5 FBS.

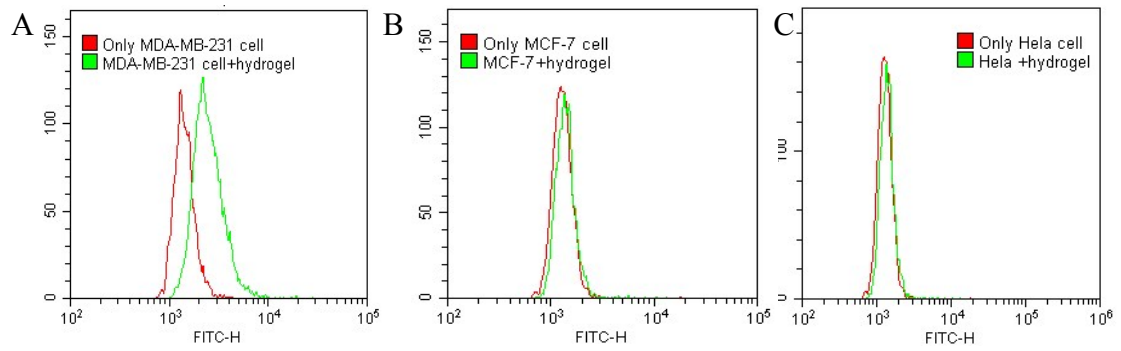

Figure S3. These three cells incubated with RNA-triple-helix hydrogel and 2 hours later, collected the fluorescence signals by Flow cytometry. A) Indicated that RNA-triple-helix hydrogel could get into the MDA-MB-231 cells. B) Indicated that RNA-triple-helix hydrogel could get into the MCF-7 cells a little. C) Indicated that RNA-triple-helix hydrogel could get into the HeLa cells a little.

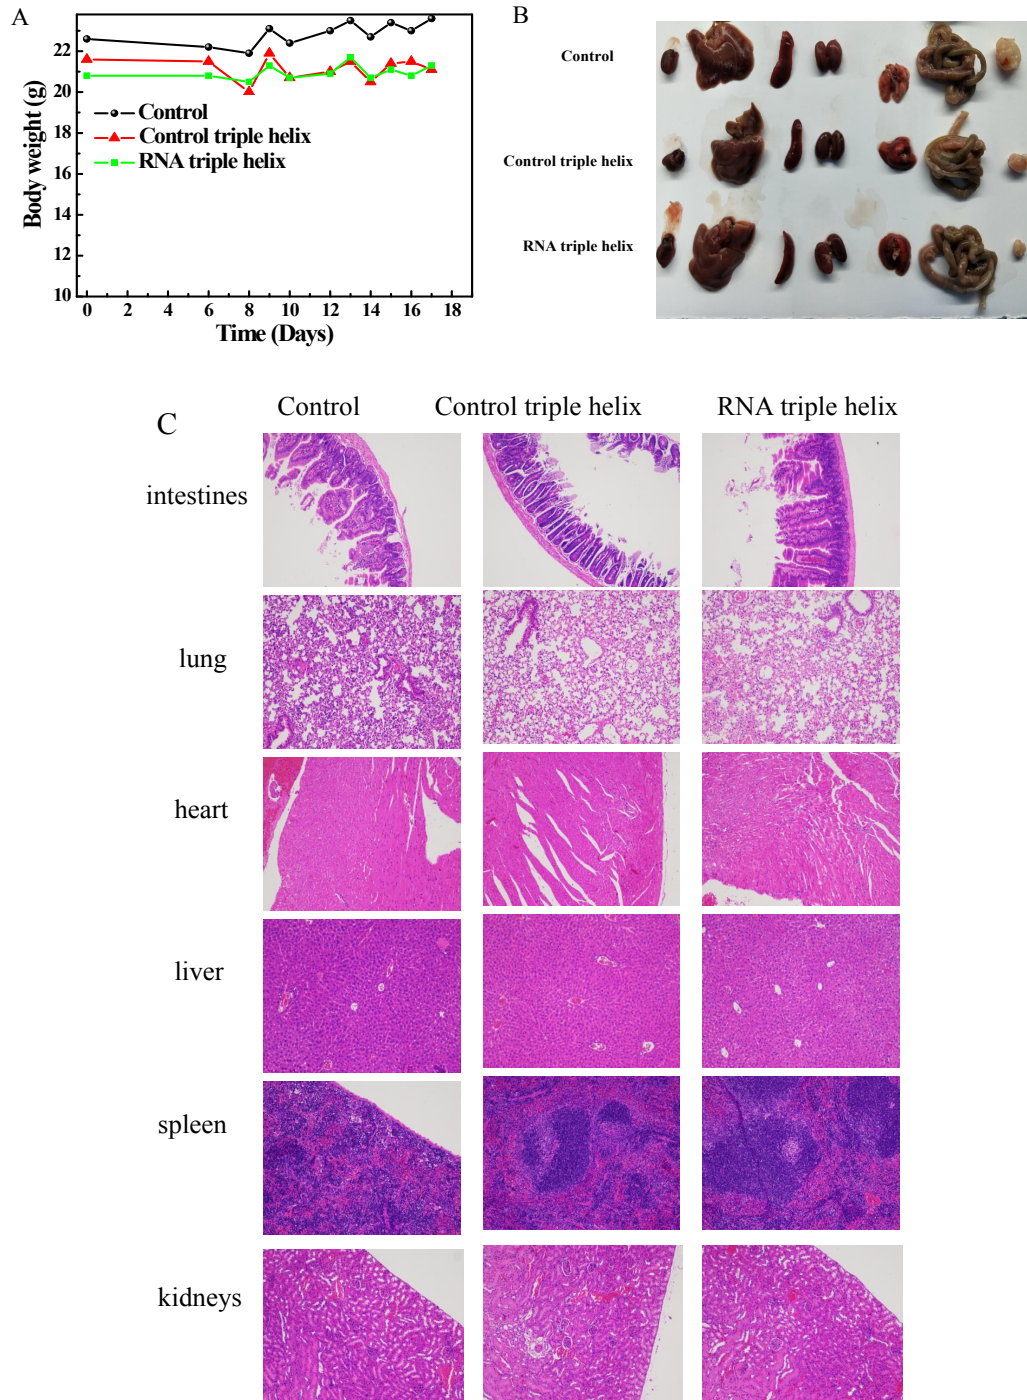

Figure S4. In vivo tumor therapy via RNA-triple-helix hydrogel. A) Body weight changes in the indicated groups during treatment (It is associated with the indoor temperature). Data represent mean  $\pm$  standard deviation (SD) ( $n = 2$  mice per group). B) The solid tumors got from these three groups. C) The H@E staining of these three groups organs indicated that there is no obvious metastasis among these organs.
